# Supplementary material
Source: PubMed Central journal article supplement (PMC11555204)
Supplement: cjcr-36-5-517-S1.pdf [file cjcr-36-5-517-S1.pdf]

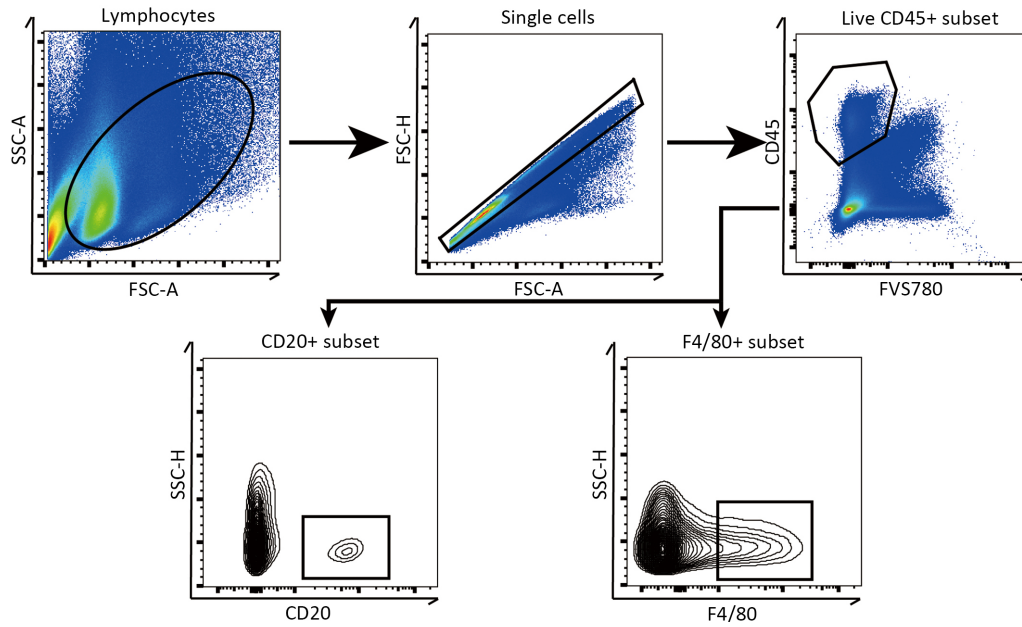

**Figure S1** Gating of flow cytometry analysis for HCC. Diagram showing the application of gating for flow cytometry. SSC-A, side scatter area; FSC-A, forward scatter area; FSC-H, forward scatter height; SSC-H, side scatter height.

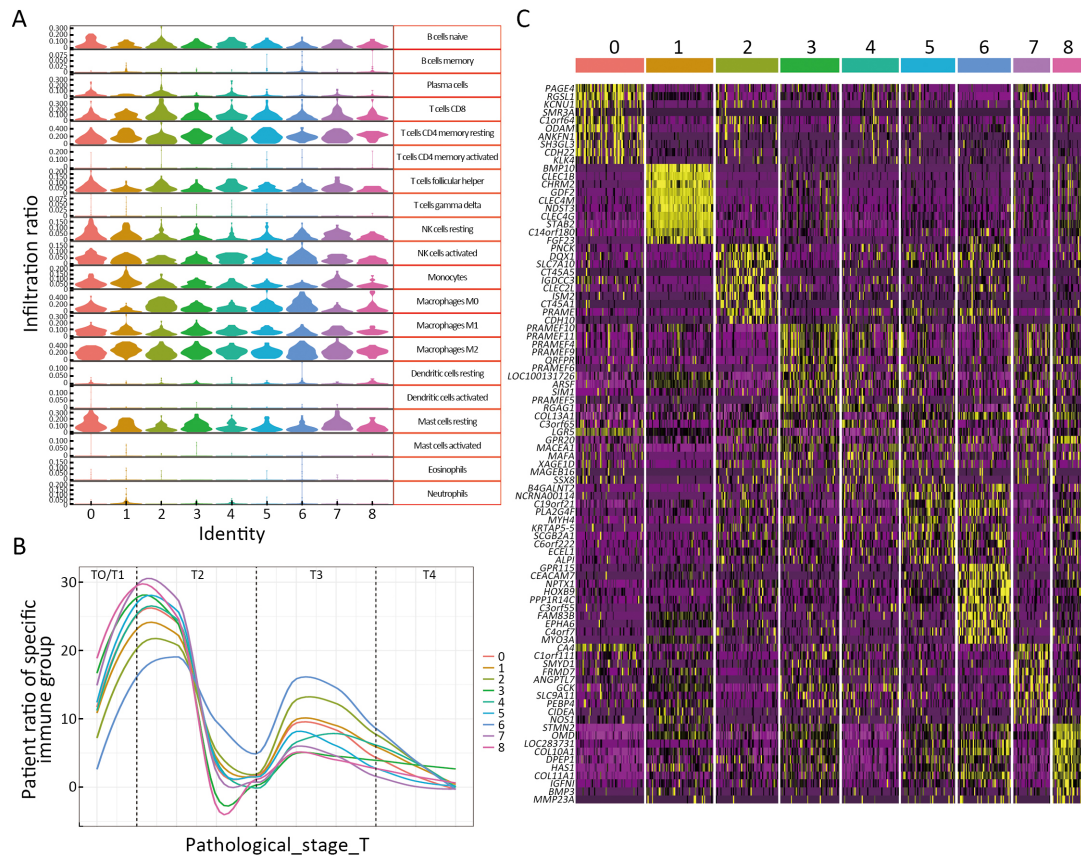

**Figure S2** High expression of *ZNF296* promotes progression of HCC. (A) Violin plot shows 20 immune cell infiltration ratios for the nine immune infiltration subtypes of LIHC; (B) Pathological stages of nine LIHC immune infiltration subtypes; (C) Marker gene heatmap of nine immune infiltration subtypes of LIHC. HCC, hepatocellular carcinoma; LIHC, liver hepatocellular carcinoma.

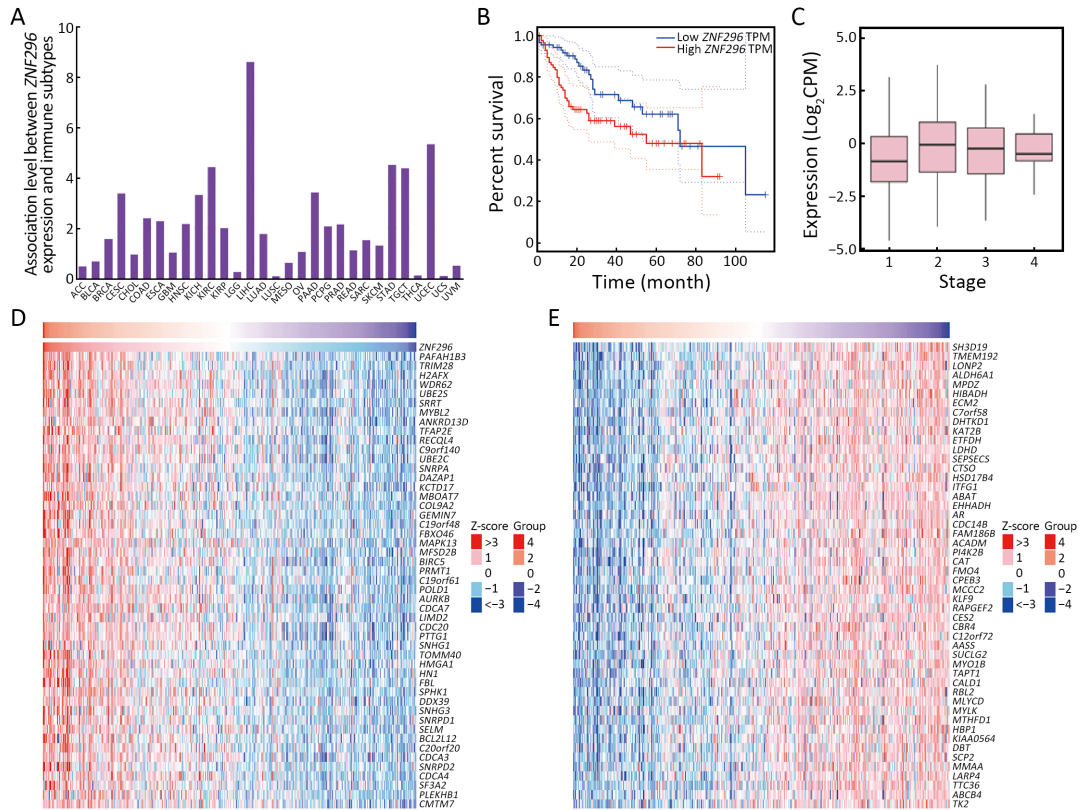

**Figure S3** *ZNF296* is the specific high-expression molecule of HCC with poor prognosis. (A) Histogram showing the association between *ZNF296* expression and immune subtypes in human cancers; (B) Kaplan-Meier analysis of TCGA database of OS of patients with high or low *ZNF296* expression (Log-rank  $P=0.023$ ); (C) Boxplot showing the associations between the expression of *ZNF296* and LIHC stage ( $r=0.14$ ,  $P=0.007$ ); (D,E) Heatmap after differential analysis shows the upregulated (D) and downregulated (E) genes in the high-expression samples of *ZNF296*. HCC, hepatocellular carcinoma; TCGA, The Cancer Genome Atlas; OS, overall survival; TPM, transcripts per million mapped reads; CPM, counts per million; ACC, adrenocortical carcinoma; BLCA, bladder urothelial carcinoma; BRCA, breast invasive carcinoma; CESC, cervical squamous cell carcinoma and endocervical adenocarcinoma; CHOL, cholangiocarcinoma; COAD, colon adenocarcinoma; ESCA, esophageal carcinoma; GBM, glioblastoma multiforme; HNSC, head and neck squamous cell carcinoma; KICH, kidney chromophobe; KIRC, kidney renal clear cell carcinoma; KIRP, kidney renal papillary cell carcinoma; LGG, lower grade glioma; LIHC, liver hepatocellular carcinoma; LUAD, lung adenocarcinoma; LUSC, lung squamous cell carcinoma; MESO, mesothelioma; OV, ovarian serous cystadenocarcinoma; PAAD, pancreatic adenocarcinoma; PCPG, pheochromocytoma and paraganglioma; PRAD, prostate adenocarcinoma; READ, rectum adenocarcinoma; SARC, sarcoma; SKCM, skin cutaneous melanoma; STAD, stomach adenocarcinoma; TGCT, testicular germ cell tumor; THCA, thyroid carcinoma; LICEC, large intestinal cancer; UCS, uterine carcinosarcoma; UVM, uveal melanoma.

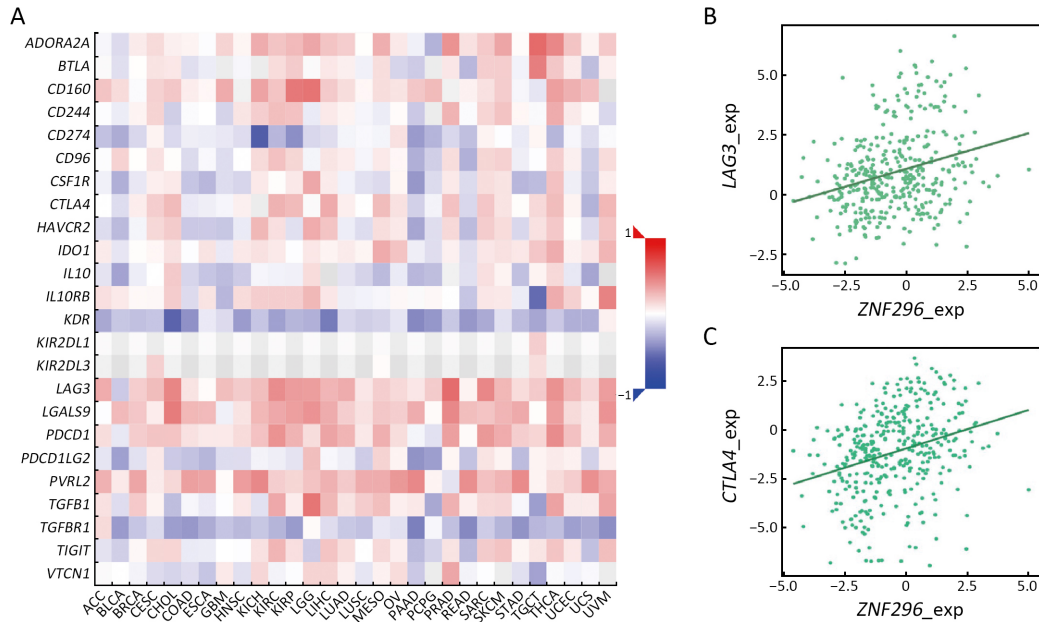

**Figure S4** High expression of *ZNF296* is correlated with expression of *LAG3* and *CTLA4*. (A) Heatmap showing Spearman correlations between the expression of *ZNF296* and immune inhibitors in human cancers; (B) Scatter plot showing the correlation between *ZNF296* and *LAG3* expression ( $r=0.27$ ); (C) Scatter plot showing the correlation between *ZNF296* and *CTLA4* expression ( $r=0.31$ ). *LAG3*, lymphocyte activation gene-3; *CTLA4*, cytotoxic T-lymphocyte associated protein 4; ACC, adrenocortical carcinoma; BLCA, bladder urothelial carcinoma; BRCA, breast invasive carcinoma; CESC, cervical squamous cell carcinoma and endocervical adenocarcinoma; CHOL, cholangiocarcinoma; COAD, colon adenocarcinoma; ESCA, esophageal carcinoma; GBM, glioblastoma multiforme; HNSC, head and neck squamous cell carcinoma; KICH, kidney chromophobe; KIRC, kidney renal clear cell carcinoma; KIRP, kidney renal papillary cell carcinoma; LGG, lower grade glioma; LIHC, liver hepatocellular carcinoma; LUAD, lung adenocarcinoma; LUSC, lung squamous cell carcinoma; MESO, mesothelioma; OV, ovarian serous cystadenocarcinoma; PAAD, pancreatic adenocarcinoma; PCPG, pheochromocytoma and paraganglioma; PRAD, prostate adenocarcinoma; READ, rectum adenocarcinoma; SARC, sarcoma; SKCM, skin cutaneous melanoma; STAD, stomach adenocarcinoma; TGCT, testicular germ cell tumors; THCA, thyroid carcinoma; LICEC, large intestinal cancer; UCS, uterine carcinosarcoma; UVM, uveal melanoma.

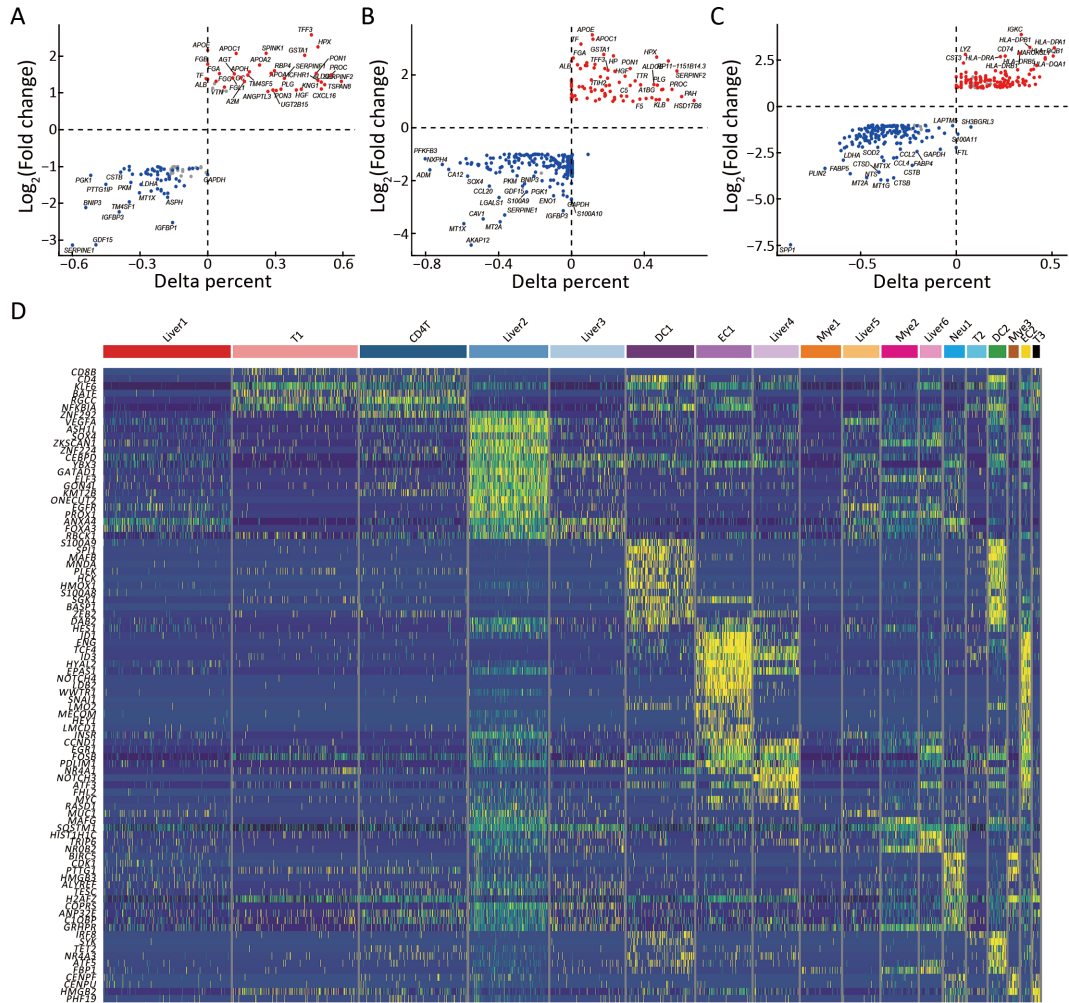

**Figure S5** Survival of patients with HCC depends on the normal function of liver and DC cells. (A–C) Differential expression analysis was performed to identify genes enriched in Liver 1 (A), Liver 2 (B), and DC1 (C) cells. For each subtype, the average log fold change and percentage of cells expressing the gene above background were compared between the two clusters (right); (D) Heatmap showing the top-expressed TFs of the 18 cell clusters. HCC, hepatocellular carcinoma; T, CD8+ T cell; CD4T, CD4+ T cell; DC, dendritic cell; EC, endothelial cell; Neu, neutrophil; Liver, liver cell; Mye, myeloid cell.
